# Supplementary material
Source: PubMed Central journal article supplement (PMC7086008)
Supplement: JZUSB21-0256-ESM.pdf [file JZUSB21-0256-ESM.pdf]

## Primary age-related tauopathy in a Chinese cohort

Xin WANG<sup>1,2</sup>, Lei ZHANG<sup>1,2</sup>, Hui LU<sup>1</sup>, Juan-li WU<sup>1</sup>, Hua-zheng LIANG<sup>3,4,5</sup>,

Chong LIU<sup>1,2</sup>, Qing-qing TAO<sup>1</sup>, Zhi-ying WU<sup>1</sup>, Ke-qing ZHU<sup>†‡1,2</sup>

<sup>1</sup>China Brain Bank and Department of Neurology in Second Affiliated Hospital, Key Laboratory of Medical Neurobiology of Zhejiang Province, and Department of Neurobiology, School of Medicine, Zhejiang University, Hangzhou 310058, China

<sup>2</sup>Department of Pathology, School of Medicine, Zhejiang University, Hangzhou 310058, China

<sup>3</sup>Department of Neurology, Shanghai Fourth People's Hospital Affiliated to Tongji University School of Medicine, Shanghai 200081, China

<sup>4</sup>Department of Neurology, Translational Research Institute of Brain and Brain-like Intelligence, Shanghai Fourth People's Hospital Affiliated to Tongji University School of Medicine, Shanghai 200081, China

<sup>5</sup>Brain Structure and Function Group, Neuroscience Research Australia, Randwick 2031, Australia

**Table S1 Assessment of the altered protein expression**

| Section                      | H&E | M-Ag | Gallyas | P62 | HP $\tau$ | A $\beta$ | $\alpha$ -Syn | P-TDP43 |
|------------------------------|-----|------|---------|-----|-----------|-----------|---------------|---------|
| Precentral/postcentral gyrus | X   | X    |         |     |           |           |               |         |
| Meninges                     | X   |      |         |     |           | X         |               |         |
| Hypothalamus                 | X   | X    |         |     |           |           |               |         |
| Temporal pole                | X   | X    | X       | X   | X         |           |               |         |
| Frontal                      | X   | X    | X       |     |           |           |               |         |
| Gyrus cinguli                | X   | X    |         |     |           |           |               |         |
| Caudatum/Putamen             | X   | X    |         |     |           |           |               |         |
| Putamen/Pallidum/Insula      | X   | X    |         |     |           |           |               |         |
| Amygdala/Entorhinal cortex   | X   | X    | X       |     |           |           | X             | X       |
| Hippocampus anterior         | X   | X    | X       |     | X         |           |               |         |
| Hippocampus middle           | X   | X    | X       | X   | X         |           |               | X       |
| Hippocampus posterior        | X   | X    | X       |     | X         |           |               |         |
| Thalamus / subthalamus       | X   |      |         |     |           |           |               |         |
| Lobulus parietalis superior  | X   |      | X       |     | X         |           |               |         |
| Parietal                     | X   | X    | X       |     |           | X         |               |         |
| Occipital pole               | X   | X    | X       |     |           | X         |               |         |
| Substantia nigra             | X   | X    |         |     |           |           | X             |         |
| Inferior colliculus /Pons    | X   |      |         |     |           |           |               |         |
| Locus coeruleus / Pons       | X   |      |         |     |           |           |               |         |
| Cerebellum / Dentate gyrus   | X   | X    |         |     |           |           |               |         |
| Medulla oblongata            | X   |      |         |     |           |           | X             |         |
| Spinal cord C                | X   |      |         |     |           |           |               |         |

H&E, hematoxylin and eosin; M-Ag, silver staining; HP, hyperphosphorylated; A $\beta$ ,  $\beta$ -amyloid;  $\alpha$ S,  $\alpha$ -synuclein; p-TDP43, hyperphosphorylated transactive response DNA binding protein 43
